# Supplementary material
Source: PubMed Central journal article supplement (PMC3382006)
Supplement: NIHMS383247-supplement-1_si_001.pdf [file NIHMS383247-supplement-1_si_001.pdf]

## Supporting Information

### Selection Strategy to Generate Aptamer Pairs that Bind to Distinct Sites on Protein Targets

Qiang Gong<sup>1</sup>, Jinpeng Wang<sup>2</sup>, Kareem M. Ahmad<sup>1</sup>, Andrew Csordas<sup>2</sup>, Jiehua Zhou<sup>3</sup>, Jeff Nie<sup>4,5</sup>, Ron Stewart<sup>4,5</sup>, James A. Thomson<sup>4,5</sup>, John J. Rossi<sup>3,6</sup>, H. Tom Soh\*<sup>1,2,7</sup>

\* To whom correspondence should be addressed. Tel: 1-(805) 893-7985; Fax: 1-(805) 893-8651; Email: tsoh@engr.ucsb.edu

<sup>1</sup>Interdepartmental Program in Biomolecular Science and Engineering, University of California Santa Barbara, Santa Barbara, CA 93106

<sup>2</sup>Department of Mechanical Engineering, University of California, Santa Barbara, CA 93106

<sup>3</sup>Division of Molecular and Cellular Biology, Beckman Research Institute of City of Hope, Duarte, CA 91010

<sup>4</sup>Morgridge Institute for Research, Madison, WI 53707

<sup>5</sup>Genome Center of Wisconsin, University of Wisconsin, Madison, WI 53706

<sup>6</sup>Irell and Manella Graduate School of Biological Sciences, Beckman Research Institute of City of Hope, Duarte, CA 91010

<sup>7</sup>Department of Materials, University of California, Santa Barbara, CA 93106

### Table of Content

|                                                                                  |     |
|----------------------------------------------------------------------------------|-----|
| Table S1: Sequencing results for the $\alpha$ V and $\beta$ 3 pools.....         | p.2 |
| Figure S1: Characterization of aptamers from $\alpha$ V and $\beta$ 3 pools..... | p.3 |
| Figure S2: Alternative MAI-SELEX specificity module scheme .....                 | p.5 |

|                        | Copy # | From $\alpha$ V pool                               |
|------------------------|--------|----------------------------------------------------|
| $\alpha$ V-1           | 4      | CACACATTCCCGTCCTCGATACGTCTAGGCTTAGTGCCACTTGCTTAATC |
| $\alpha$ V-2           | 2      | CACACATTCCCGTCCTCGATAAGTCTAGGCTTAGTGCCACTTACTTAATC |
| $\alpha$ V $\beta$ 3-1 | 15     | CACACATTCCCGTCCTCGATAAGTCTAGGCTTAGTGCCACTTGCTTAATC |
|                        | 1      | CACACATCCCGTCCTCGATAAGTCTAGGCTTAGTGCCACTTACTTAATC  |

|                        | Copy # | From $\beta$ 3 pool                                |
|------------------------|--------|----------------------------------------------------|
| $\beta$ 3-1            | 11     | CCCAGATTACTGTGGAGTGGTTGTCTGCGAATCCTTCGTCCACCCAATAG |
| $\beta$ 3-2            | 1      | CCCAGATTACTGTGGAGTGGTTGTCTGCGAATCCTTCGTCCACCCAATAT |
| $\beta$ 3-3            | 1      | CCCAGATTACTGTGGAGTGGTTGTCTGCGAATCCTTCGTCCACCCTATAG |
| $\alpha$ V $\beta$ 3-1 | 2      | CACACATTCCCGTCCTCGATAAGTCTAGGCTTAGTGCCACTTGCTTAATC |
|                        | 1      | GCCAGATTACTGTGGAGTGGTTGTCTGCGAATCCTTGGTCCACCCAATAG |
|                        | 1      | GACGCTTTCACCATATAATAATGAGACCTATTCAGTGCGATTCGTGCCG  |

**Table S1. Sequencing results for the  $\alpha$ V and  $\beta$ 3 pools.** We selected six representative sequences from the  $\alpha$ V and  $\beta$ 3 pools for affinity and specificity characterization. The sequences shown above are from 50N random region, which are flanked by the PCR primer sites (see Experimental Section for sequences)

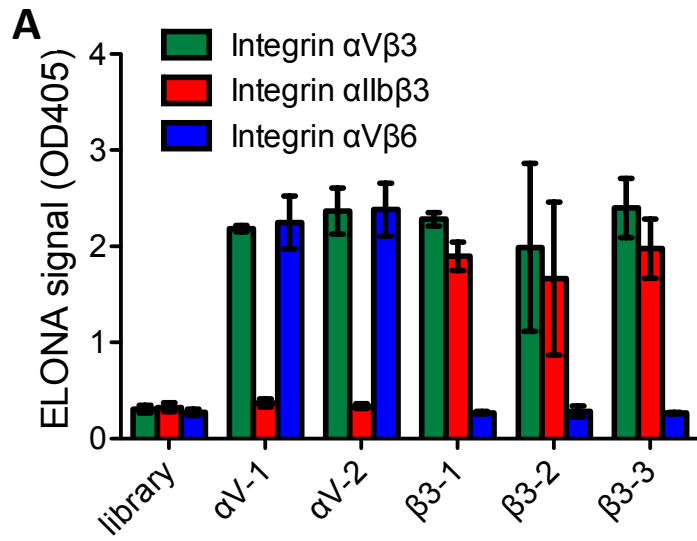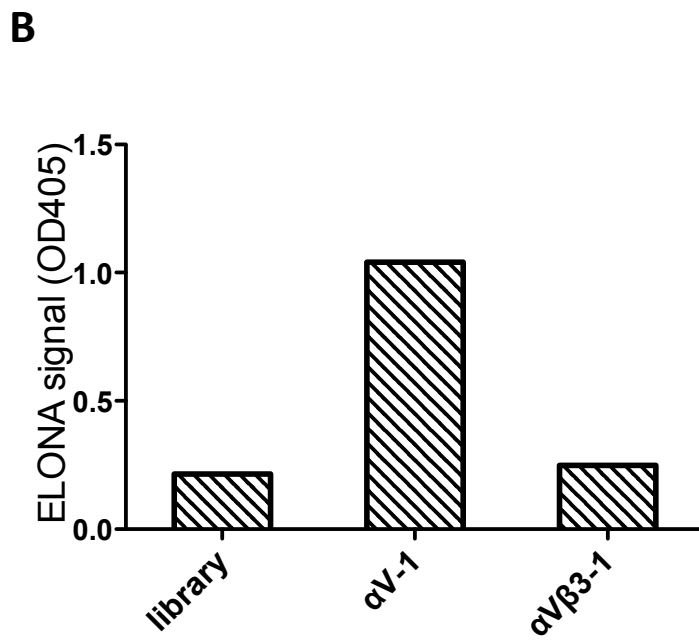

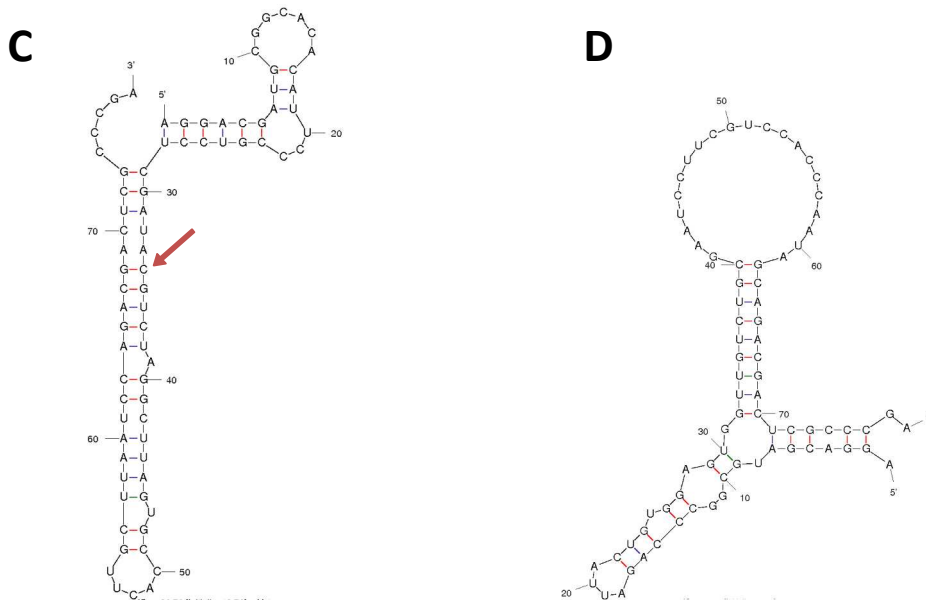

**Fig. S1. Characterization of aptamers from  $\alpha V$  and  $\beta 3$  pools.** (A) We performed ELONA with individual aptamers to characterize their affinity for different integrin proteins. Both  $\alpha V-1$  and  $\alpha V-2$  showed only background levels of binding to integrin  $\alpha IIb\beta 3$ , but significant binding to integrin  $\alpha V\beta 3$  and  $\alpha V\beta 6$ ; On the other hand, all the aptamer sequences from the  $\beta 3$  pool showed significant binding to integrin  $\alpha V\beta 3$  and  $\alpha IIb\beta 6$ , but not integrin  $\alpha V\beta 6$ . This result indicated that, as expected from MAI-SELEX design, aptamers from the  $\alpha V$  pool selectively bind the  $\alpha V$  subunit while aptamers from the  $\beta 3$  pool specifically bind the  $\beta 3$  subunit. (B) The  $\alpha V\beta 3-1$  sequence, which appeared in both  $\alpha V$  and  $\beta 3$  pools, exhibits negligible binding to integrin  $\alpha V\beta 3$ . We suspect that the sequence may originate from biases during synthesis or selection. (C) & (D) Model of secondary structure of  $\alpha V-1$  and  $\beta 3-1$  aptamers obtained using the mfold<sup>1</sup> software. The arrow in (C) indicates the single base difference between  $\alpha V-1$  and  $\alpha V\beta 3-1$ , and is responsible for the dramatically different binding properties between the two aptamers. Such large differences binding properties arising from single base differences have been previously reported in literature.<sup>2</sup>

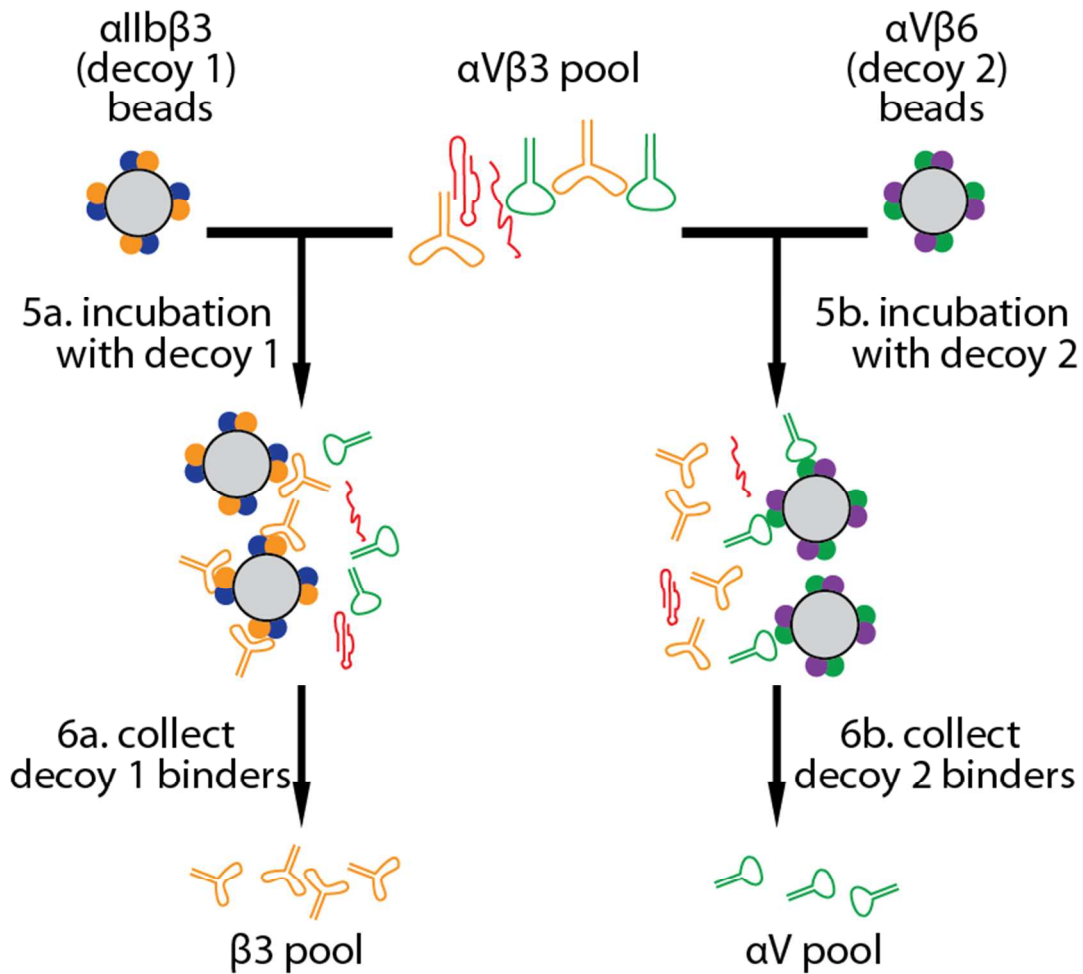

**Fig. S2. Alternative MAI-SELEX specificity module scheme.** Availability of two decoys would further improve the efficiency of the specificity module. For example, the  $\alpha V\beta 3$  pool could be incubated with an  $\alpha V$ -containing homolog, integrin  $\alpha V\beta 6$  (step 5b), which will capture  $\alpha V$ -binding aptamers but not  $\beta 3$ -binding aptamers. Eluting the sequences that bind to integrin  $\alpha V\beta 6$  will lead to enhanced isolation of the  $\alpha V$  pool (step 6b). The  $\beta 3$  pool can be isolated similarly, using integrin  $\alpha IIb\beta 3$  as the decoy (step 5a, 6a).

Reference:

- (1) Zuker, M. *Nucleic Acids Res* **2003**, *31*, 3406.
- (2) Katilius, E.; Flores, C.; Woodbury, N. W. *Nucleic Acids Res* **2007**, *35*, 7626.
